# Supplementary material for: Fe-modulated NH2–CoFe MOF nanosheet arrays on nickel foam by cation exchange reaction for an efficient OER electrocatalyst at high current density in alkaline water/seawater
Source: Royal Society of Chemistry journal article supplement (doi:10.1039/d3ce00728f), 2023-01-01
Supplement: d3ce00728f2.pdf [file d3ce00728f2.pdf]

## Electronic Supplementary Information

### **Fe-modulated NH<sub>2</sub>-CoFe MOF nanosheet arrays on nickel foam by cation exchange reaction for efficient OER electrocatalyst at high current density in alkaline water/seawater**

Dong Hyun Kim<sup>a</sup>, Juyoung Moon<sup>b</sup>, So Yeon Lee<sup>a</sup>, Hyun Ji An<sup>a</sup>, Hayeon Jeong<sup>a</sup> and Jung Tae Park<sup>a\*</sup>

*<sup>a</sup> Department of Chemical Engineering, Konkuk University,*

*120 Neungdong-ro, Gwangjin-gu, Seoul 05029, Republic of Korea*

*<sup>b</sup> Department of Chemical and Biomolecular Engineering, Yonsei University,*

*50 Yonsei-ro, Seodaemun-gu, Seoul 03722, Republic of Korea*

\* To whom correspondence should be addressed

Tel: +82-2-450-3538; Fax: +82-2-450-3504

E-mail: jtpark25@konkuk.ac.kr

**Number of Pages: 30**

**Number of Figures: 22**

**Number of Tables: 5**

## Table of Contents

|                                                                                                                                                                                                                                    |     |
|------------------------------------------------------------------------------------------------------------------------------------------------------------------------------------------------------------------------------------|-----|
| <b>Figure S1.</b> Photograph image for measuring pH of 1M KOH electrolyte. ....                                                                                                                                                    | S4  |
| <b>Table S1.</b> List of Abbreviations. ....                                                                                                                                                                                       | S5  |
| <b>Figure S2.</b> Real images of NF, NH <sub>2</sub> -Co MOF, and NH <sub>2</sub> -CoFe MOF.....                                                                                                                                   | S6  |
| <b>Figure S3.</b> SEM images of NH <sub>2</sub> -Co MOF on NF at different magnifications.....                                                                                                                                     | S7  |
| <b>Figure S4.</b> SEM images of NH <sub>2</sub> -CoFe MOF on NF at different magnifications.....                                                                                                                                   | S8  |
| <b>Figure S5.</b> SEM images of (a) Co MOF, (b) CoFe MOF on a NF with BDC linker.....                                                                                                                                              | S9  |
| <b>Figure S6.</b> FE-TEM images of NH <sub>2</sub> -Co MOF with high magnification.....                                                                                                                                            | S10 |
| <b>Figure S7.</b> (a) TEM-EDS mapping images of (b) Co, (c) C, (d) N, and (e) O for NH <sub>2</sub> -Co MOF. ....                                                                                                                  | S11 |
| <b>Figure S8.</b> (a) TEM-EDS mapping images of (b) Co, (c) Fe, (d) C, (e) N, and (f) O for NH <sub>2</sub> -CoFe MOF-FeCl <sub>3</sub> .....                                                                                      | S12 |
| <b>Figure S9.</b> Schematic illustration of the crystal structure of NH <sub>2</sub> -Co MOF (CCDC no 1016535). The Co, C, O, N, and H atoms are marked in blue, brown, red, white, and ivory colors, respectively. ....           | S13 |
| <b>Figure S10.</b> XRD patterns of NH <sub>2</sub> -Co MOF, NH <sub>2</sub> -CoFe MOF-FeCl <sub>3</sub> , and NH <sub>2</sub> -CoFe MOF in low-angle range ( $2\theta=10\sim 12^\circ$ ). ....                                     | S14 |
| <b>Figure S11.</b> FT-IR spectra of Co MOF and CoFe MOF on a NF with BDC linker. ....                                                                                                                                              | S15 |
| <b>Figure S12.</b> XPS spectra of NH <sub>2</sub> -Co MOF (a) survey; (b) C 1s; (c) O 1s; (d) N 1s; (e) Co 2p.....                                                                                                                 | S16 |
| <b>Figure S13.</b> XPS spectra of NH <sub>2</sub> -CoFe MOF-FeCl <sub>3</sub> (a) survey; (b) C 1s; (c) O 1s; (d) N 1s; (e) Fe 2p; (f) Co 2p. ....                                                                                 | S17 |
| <b>Figure S14.</b> XPS spectra of NH <sub>2</sub> -CoFe MOF (a) survey; (b) C 1s; (c) O 1s; (d) N 1s; (e) Fe 2p; (f) Co 2p.....                                                                                                    | S18 |
| <b>Figure S15.</b> (a) The chemical compositions, (b) The percentage of various chemical states of O in NH <sub>2</sub> -Co MOF, NH <sub>2</sub> -CoFe MOF-FeCl <sub>3</sub> , and NH <sub>2</sub> -CoFe MOF obtained by XPS. .... | S19 |
| <b>Table S2.</b> XPS spectra results of Co 2p, Fe 2p, O 1s, N 1s, and C 1s of NH <sub>2</sub> -Co MOF, NH <sub>2</sub> -CoFe MOF-FeCl <sub>3</sub> , and NH <sub>2</sub> -CoFe MOF. ....                                           | S20 |

|                                                                                                                                                                                                                 |     |
|-----------------------------------------------------------------------------------------------------------------------------------------------------------------------------------------------------------------|-----|
| <b>Figure S16.</b> (a) LSV curves at $2\text{mV s}^{-1}$ with 90% iR compensation, (b) volcano plot of $\text{NH}_2\text{-CoFe MOF}$ with different concentrations of $\text{FeSO}_4$ aqueous solution. ....    | S21 |
| <b>Figure S17.</b> LSV curves of Co MOF, CoFe MOF, $\text{NH}_2\text{-CoFe MOF}$ with difference linkers at $2\text{mV s}^{-1}$ with 90% iR compensation. ....                                                  | S22 |
| <b>Figure S18.</b> Backward LSV curves of Bare NF, $\text{NH}_2\text{-Co MOF}$ , $\text{NH}_2\text{-CoFe MOF-FeCl}_3$ , and $\text{NH}_2\text{-CoFe MOF}$ at $2\text{mV s}^{-1}$ with 90% iR compensation. .... | S23 |
| <b>Table S3.</b> Overpotential of OER catalyts at $100\text{ mA cm}^{-2}$ . ....                                                                                                                                | S24 |
| <b>Figure S19.</b> Cyclic voltammograms of (a) Bare NF, (b) $\text{NH}_2\text{-Co MOF}$ , (c) $\text{NH}_2\text{-CoFe MOF-FeCl}_3$ , and (d) $\text{NH}_2\text{-CoFe MOF}$ . ....                               | S25 |
| <b>Table S4.</b> Calculated ECSA from $C_{dl}$ values of NF, $\text{NH}_2\text{-Co MOF}$ , $\text{NH}_2\text{-CoFe MOF-FeCl}_3$ , and $\text{NH}_2\text{-CoFe MOF}$ . ....                                      | S26 |
| <b>Figure S20.</b> XPS spectra of $\text{NH}_2\text{-CoFe MOF}$ after stability test for 50 h, (a) survey; (b) O 1s; (c) Fe 2p; (d) Co 2p. ....                                                                 | S27 |
| <b>Figure S21.</b> Reproducibility test of the $\text{NH}_2\text{-Co MOF}$ , $\text{NH}_2\text{-CoFe MOF}$ . ....                                                                                               | S28 |
| <b>Table S5.</b> Catalytic properties for OER of the Fe, and Co-based electrocatalysts in alkaline electrolyte. ....                                                                                            | S29 |
| <b>Figure S22.</b> Photographs of natural seawater of Gimnyeong sea in Jeju island, Korea, and 3 electrode cell for OER measurement in 1M KOH with sea water. ....                                              | S30 |

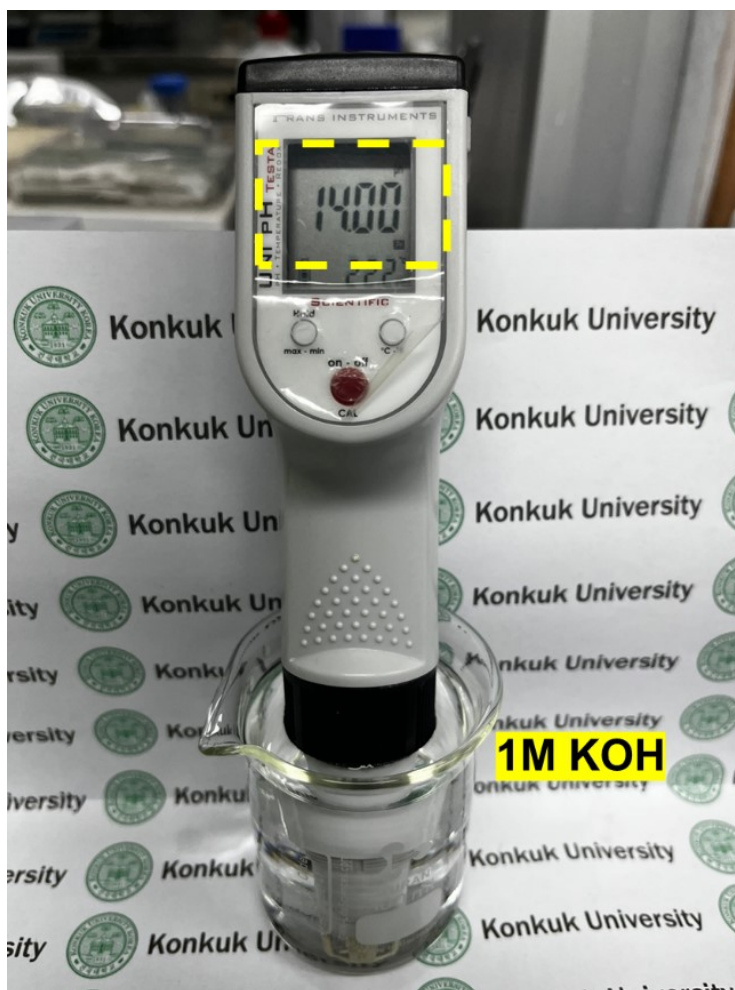

**Figure S1.** Photograph image for measuring pH of 1M KOH electrolyte.

**Table S1.** List of Abbreviations.

| Abbreviations                               | Full form                                                                                                    |
|---------------------------------------------|--------------------------------------------------------------------------------------------------------------|
| NF                                          | Nickel foam                                                                                                  |
| NH <sub>2</sub> -Co MOF                     | Amino functionalized Cobalt-Metal organic framework with NH <sub>2</sub> -BDC linker                         |
| Co MOF                                      | Cobalt-Metal organic framework with BDC linker                                                               |
| CoFe MOF                                    | Cobalt, Iron-Metal organic framework by cation exchange reaction with FeSO <sub>4</sub>                      |
| NH <sub>2</sub> -CoFe MOF-FeCl <sub>3</sub> | Amino functionalized Cobalt, Iron-Metal organic framework by cation exchange reaction with FeCl <sub>3</sub> |
| NH <sub>2</sub> -CoFe MOF                   | Amino functionalized Cobalt, Iron-Metal organic framework by cation exchange reaction with FeSO <sub>4</sub> |

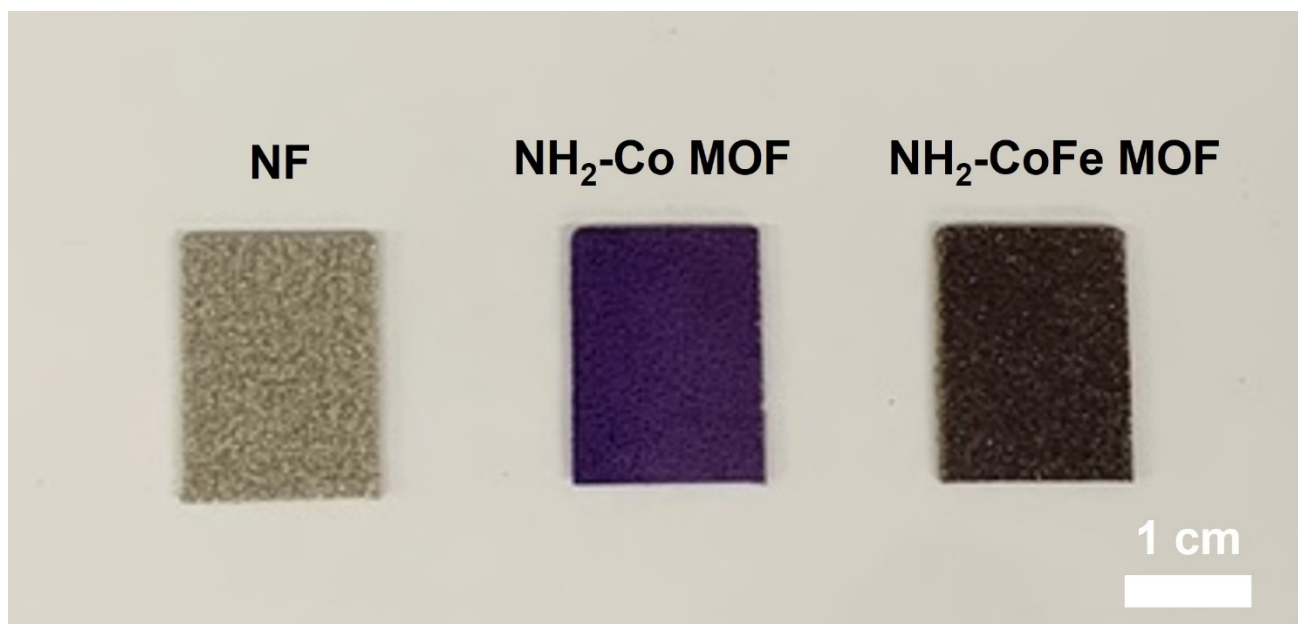

**Figure S2.** Real images of NF, NH<sub>2</sub>-Co MOF, and NH<sub>2</sub>-CoFe MOF.

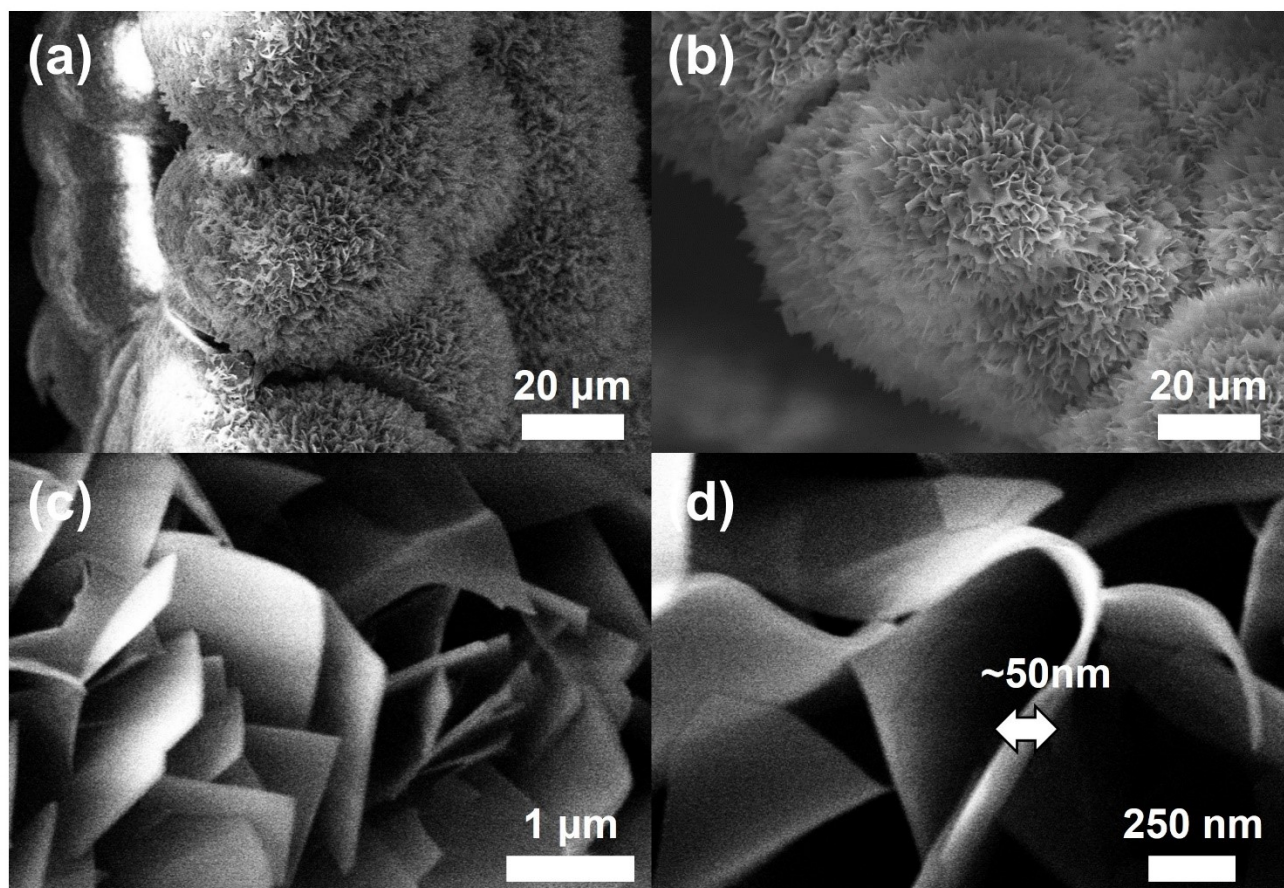

**Figure S3.** SEM images of  $\text{NH}_2\text{-Co MOF}$  on NF at different magnifications.

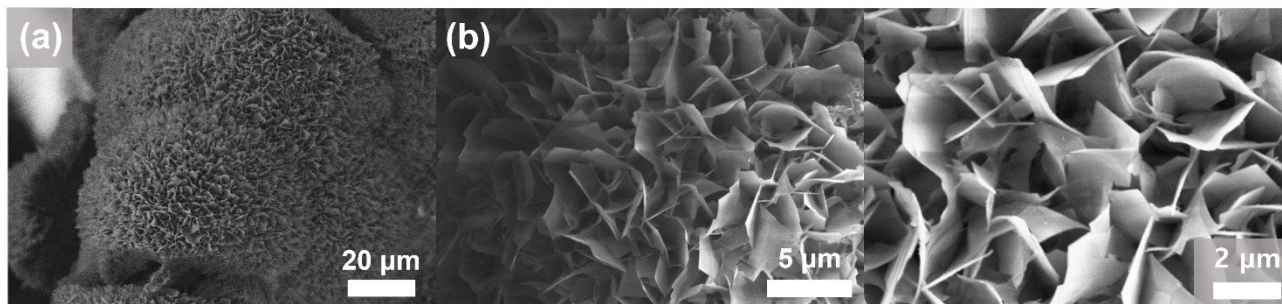

**Figure S4.** SEM images of NH<sub>2</sub>-CoFe MOF on NF at different magnifications.



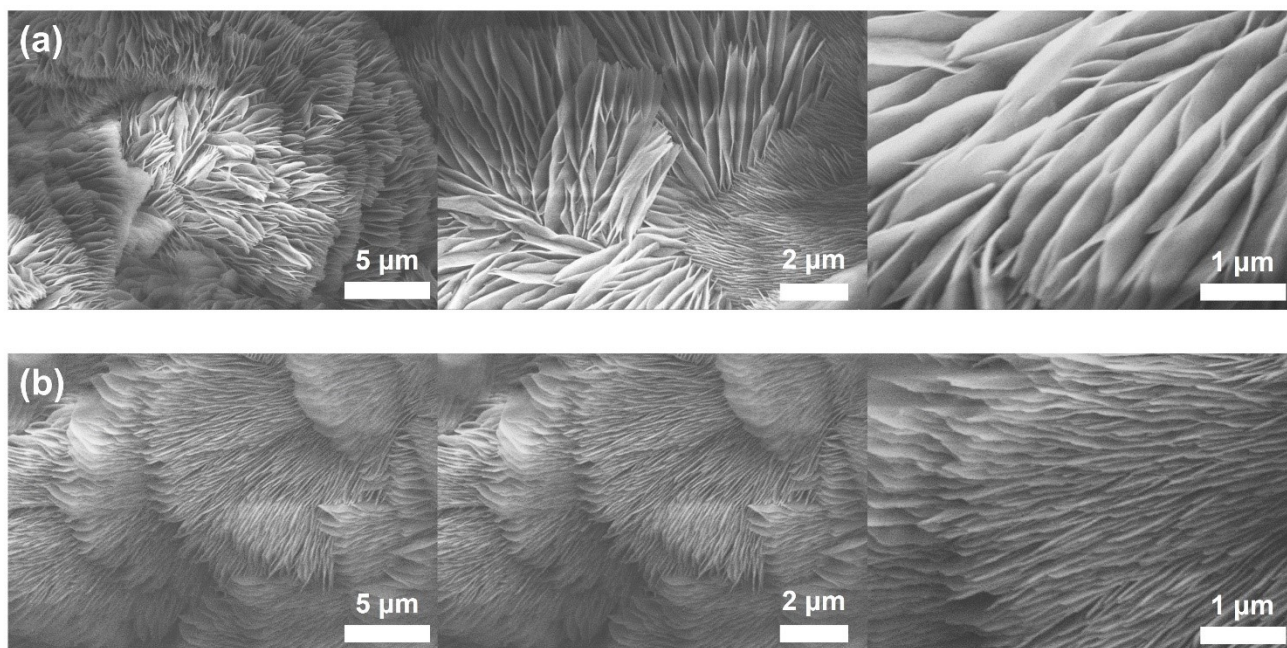

**Figure S5.** SEM images of (a) Co MOF, (b) CoFe MOF on a NF with BDC linker.

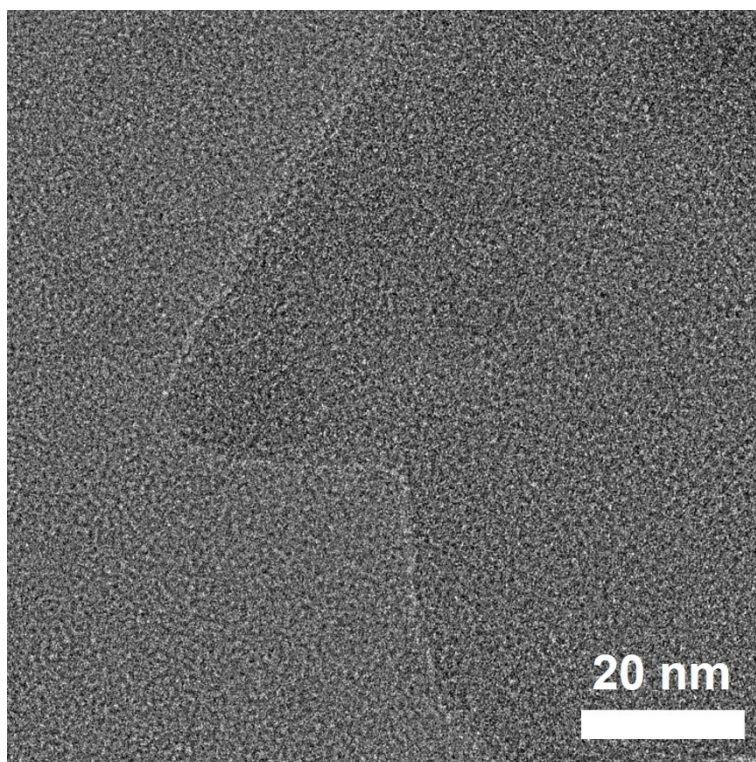

**Figure S6.** FE-TEM images of NH<sub>2</sub>-Co MOF with high magnification.

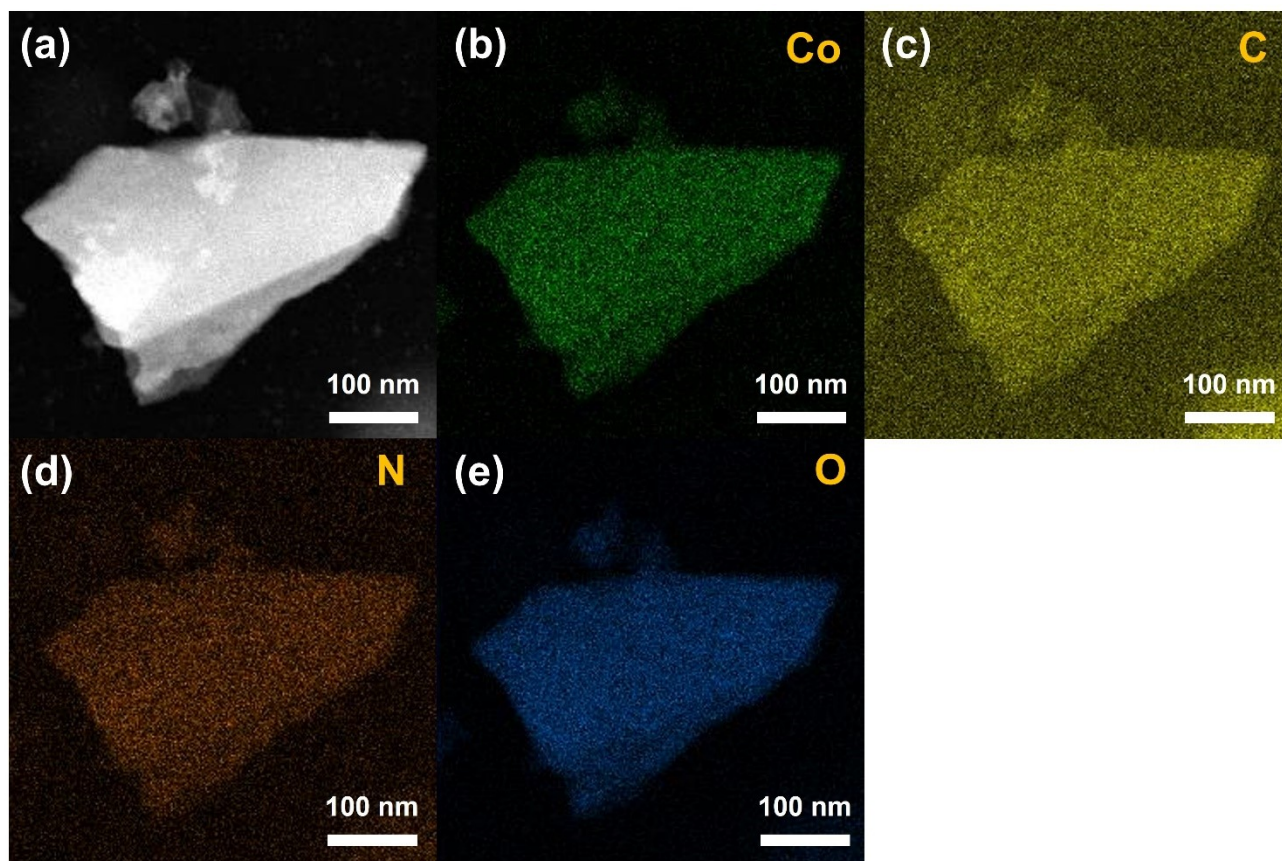

**Figure S7.** (a) TEM-EDS mapping images of (b) Co, (c) C, (d) N, and (e) O for NH<sub>2</sub>-Co MOF.



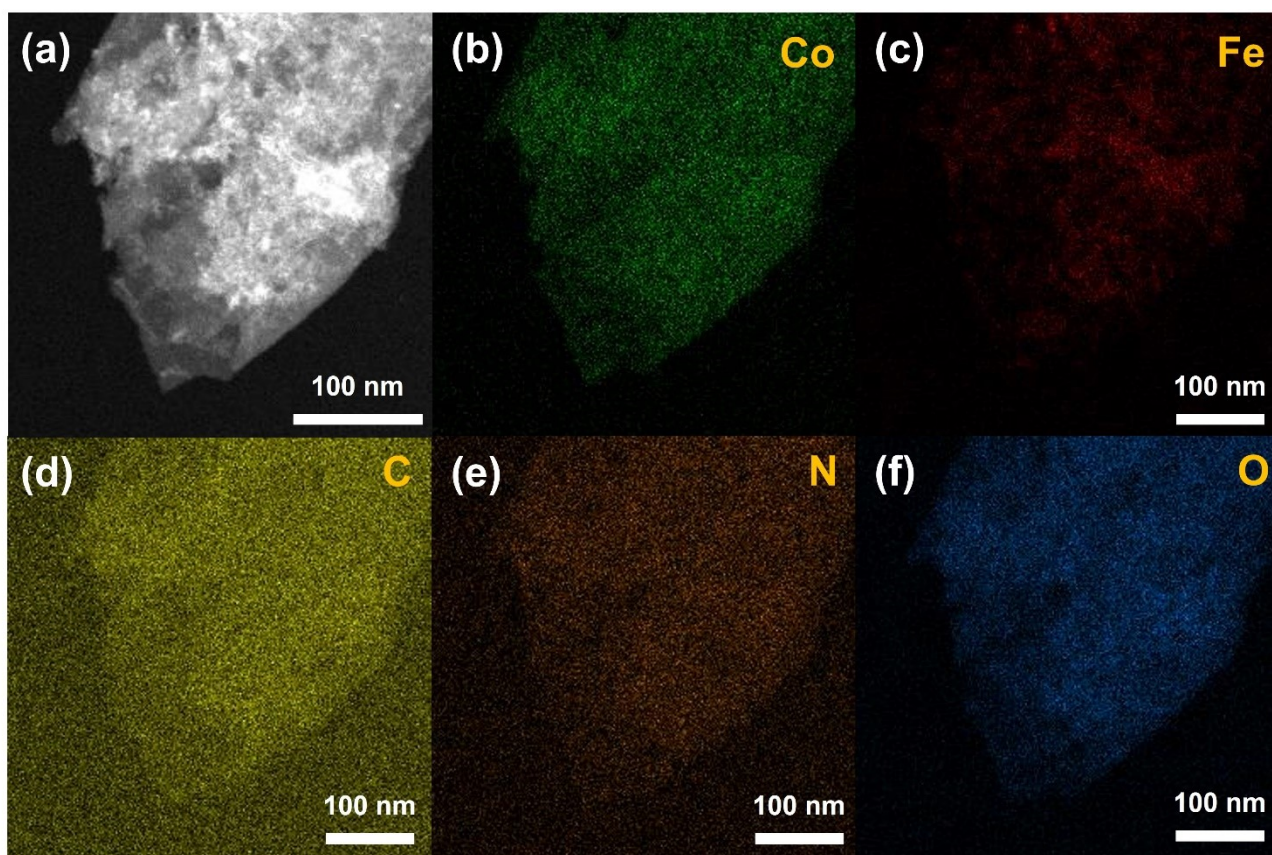

**Figure S8.** (a) TEM-EDS mapping images of (b) Co, (c) Fe, (d) C, (e) N, and (f) O for NH<sub>2</sub>-CoFe MOF-FeCl<sub>3</sub>.

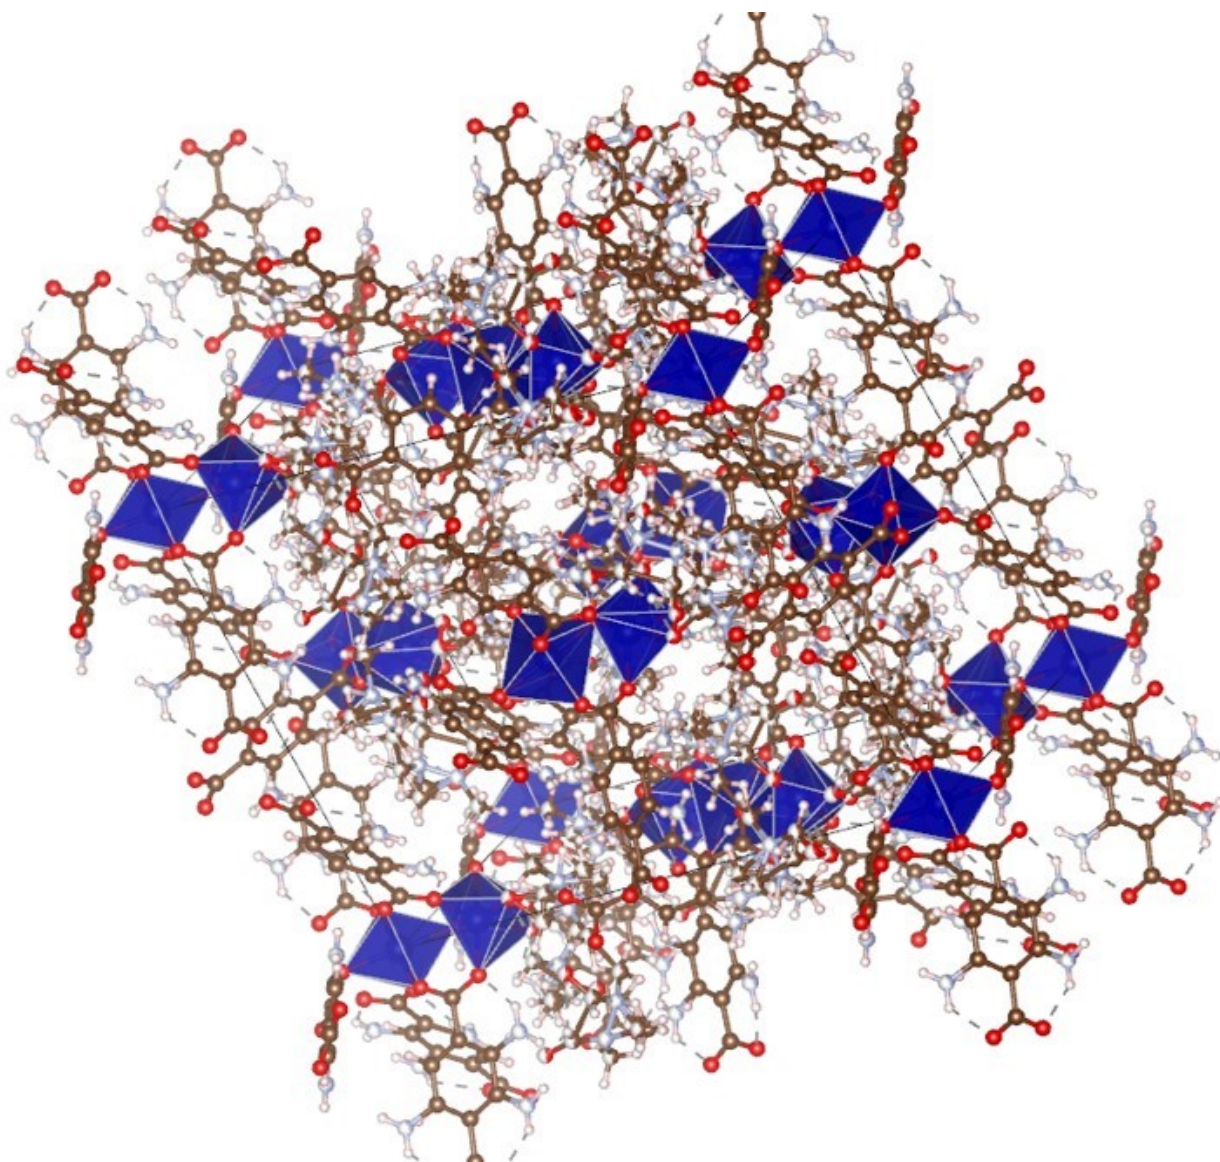

**Figure S9.** Schematic illustration of the crystal structure of  $\text{NH}_2\text{-Co MOF}$  (CCDC no 1016535). The Co, C, O, N, and H atoms are marked in blue, brown, red, white, and ivory colors, respectively.

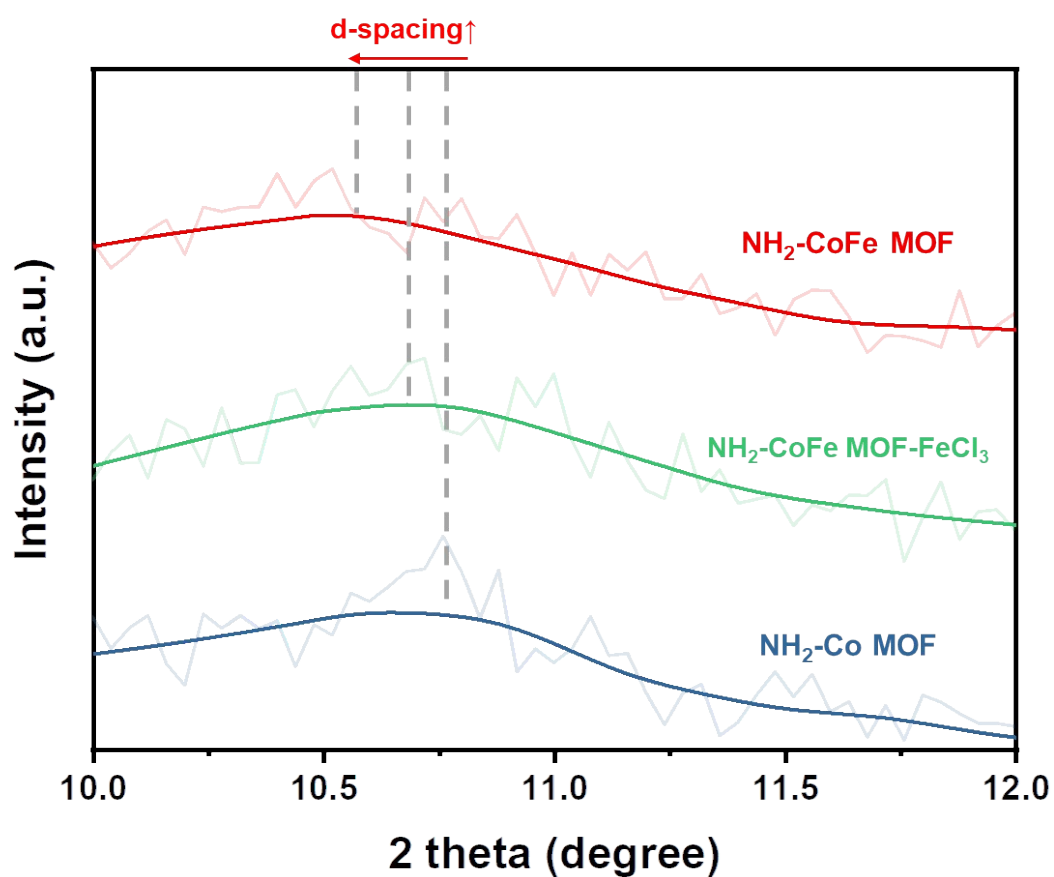

**Figure S10.** XRD patterns of NH<sub>2</sub>-Co MOF, NH<sub>2</sub>-CoFe MOF-FeCl<sub>3</sub>, and NH<sub>2</sub>-CoFe MOF in low-angle range ( $2\theta=10\sim 12^\circ$ ).

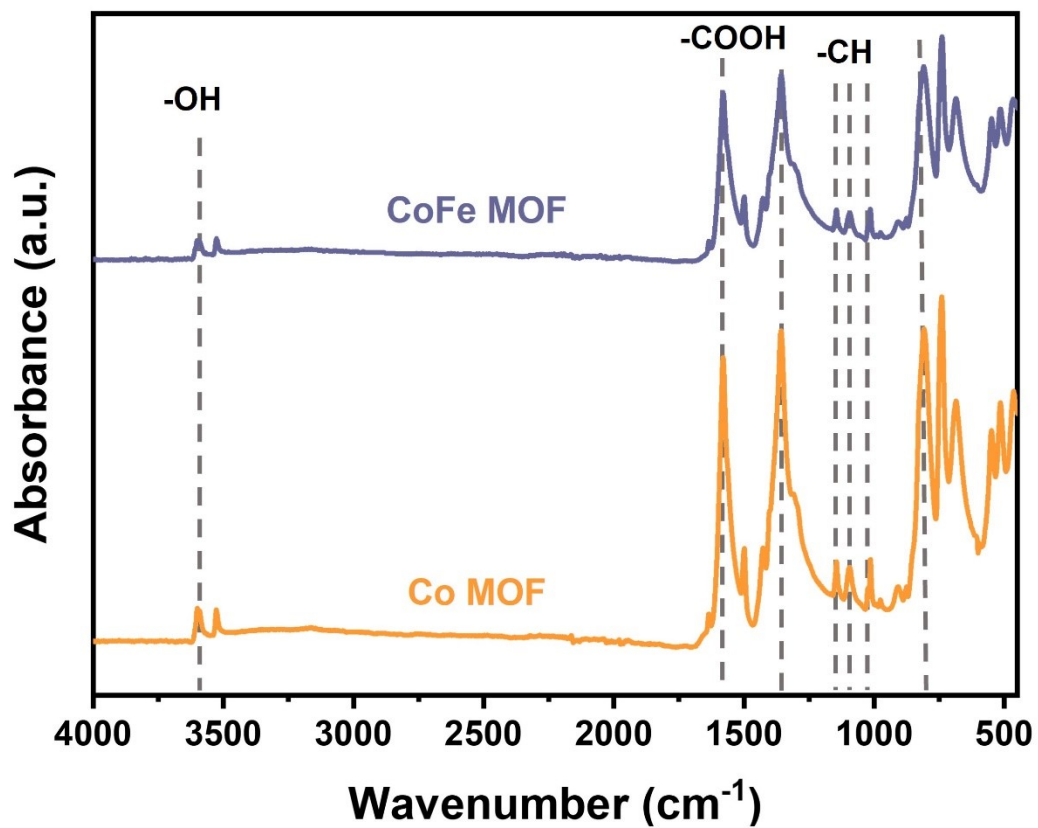

**Figure S11.** FT-IR spectra of Co MOF and CoFe MOF on a NF with BDC linker.

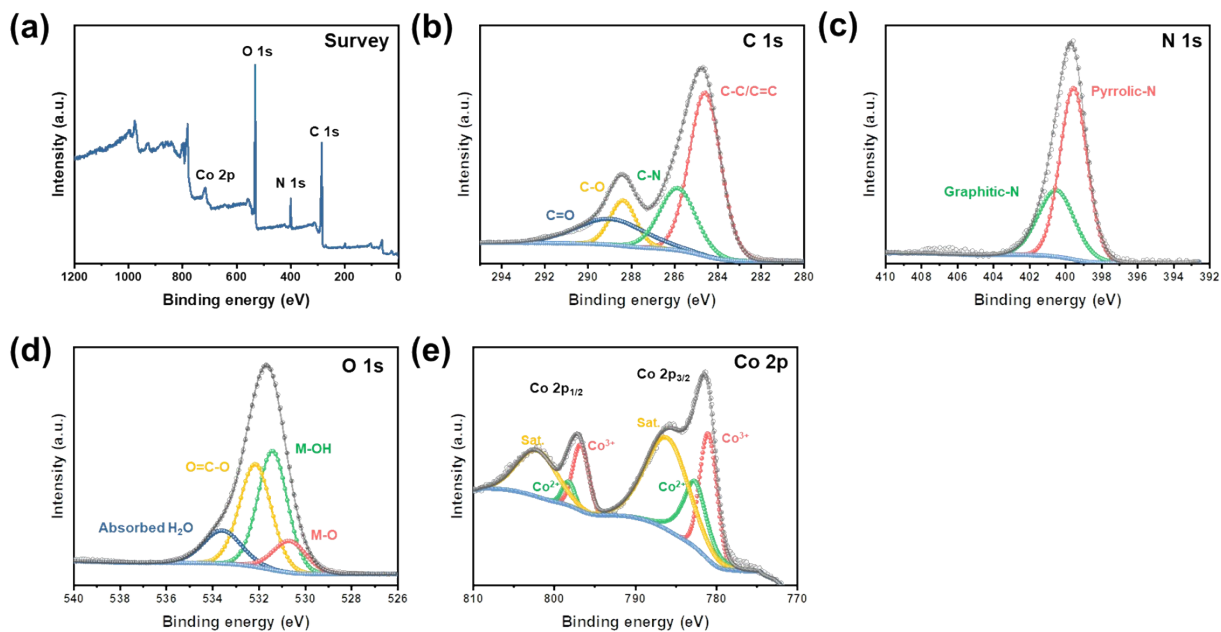

**Figure S12.** XPS spectra of NH<sub>2</sub>-Co MOF (a) survey; (b) C 1s; (c) O 1s; (d) N 1s; (e) Co 2p.



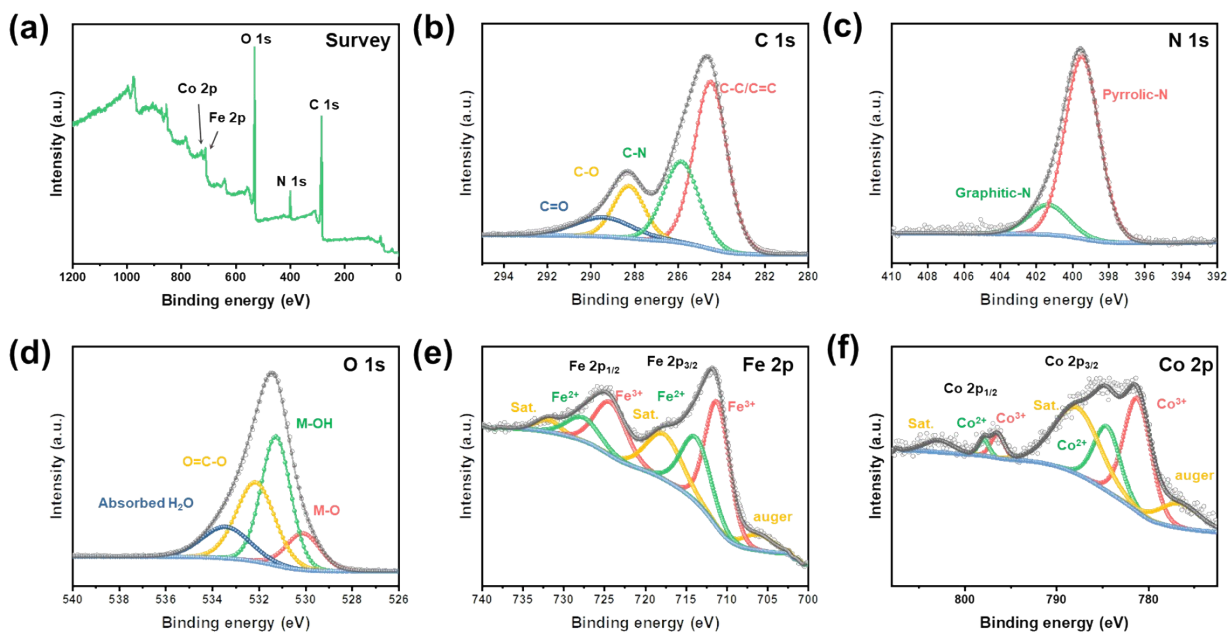

**Figure S13.** XPS spectra of  $\text{NH}_2\text{-CoFe MOF-FeCl}_3$  (a) survey; (b) C 1s; (c) O 1s; (d) N 1s; (e) Fe 2p; (f) Co 2p.

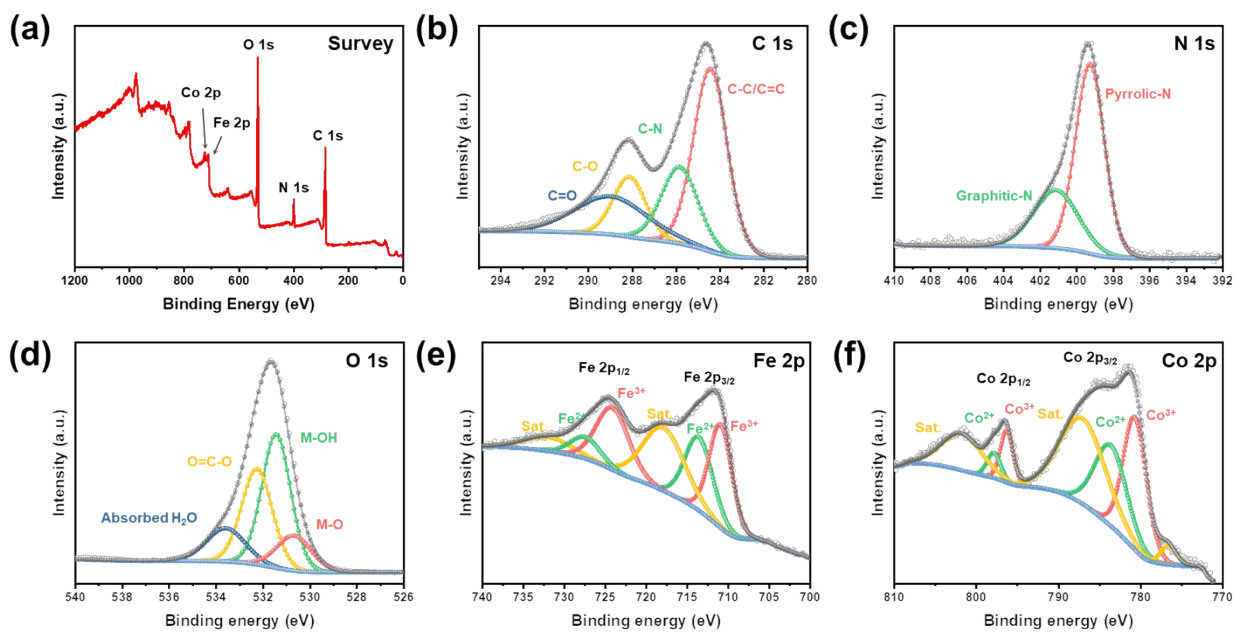

**Figure S14.** XPS spectra of NH<sub>2</sub>-CoFe MOF (a) survey; (b) C 1s; (c) O 1s; (d) N 1s; (e) Fe 2p; (f) Co 2p.

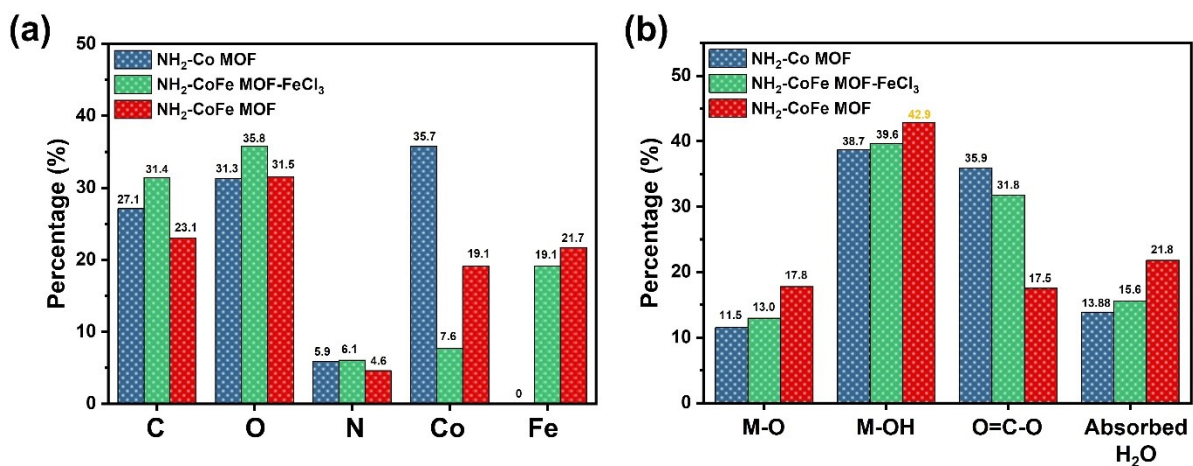

**Figure S15.** (a) The chemical compositions, (b) The percentage of various chemical states of O in NH<sub>2</sub>-Co MOF, NH<sub>2</sub>-CoFe MOF-FeCl<sub>3</sub>, and NH<sub>2</sub>-CoFe MOF obtained by XPS.

**Table S2.** XPS spectra results of Co 2p, Fe 2p, O 1s, N 1s, and C 1s of NH<sub>2</sub>-Co MOF, NH<sub>2</sub>-CoFe MOF-FeCl<sub>3</sub>, and NH<sub>2</sub>-CoFe MOF.

| Peak  | Assignment                | NH <sub>2</sub> -Co MOF | NH <sub>2</sub> -CoFe MOF-<br>FeCl <sub>3</sub> | NH <sub>2</sub> -CoFe MOF |
|-------|---------------------------|-------------------------|-------------------------------------------------|---------------------------|
|       |                           | Binding energy (eV)     |                                                 |                           |
| Co 2p | 2p <sub>1/2</sub>         | 796.7                   | 796.4                                           | 796.3                     |
|       | 2p <sub>3/2</sub>         | 781.5                   | 781.3                                           | 781.1                     |
| Fe 2p | 2p <sub>1/2</sub>         | -                       | 724.7                                           | 724.6                     |
|       | 2p <sub>3/2</sub>         | -                       | 711.7                                           | 711.7                     |
| O 1s  | M-O                       | 530.6                   | 530.6                                           | 530.6                     |
|       | M-OH                      | 531.3                   | 531.2                                           | 531.4                     |
|       | O=C-O                     | 532.1                   | 532.1                                           | 532.1                     |
|       | Absorbed H <sub>2</sub> O | 533.5                   | 533.4                                           | 533.4                     |
| N 1s  | Graphitic-N               | 399.5                   | 399.5                                           | 399.3                     |
|       | Pyrrolic-N                | 400.4                   | 401.3                                           | 401.1                     |
| C 1s  | C-C/C=C                   | 284.5                   | 284.4                                           | 284.4                     |
|       | C-N                       | 285.8                   | 285.8                                           | 285.8                     |
|       | C-O                       | 288.3                   | 288.2                                           | 288.2                     |
|       | C=O                       | 289.1                   | 289.1                                           | 289.1                     |

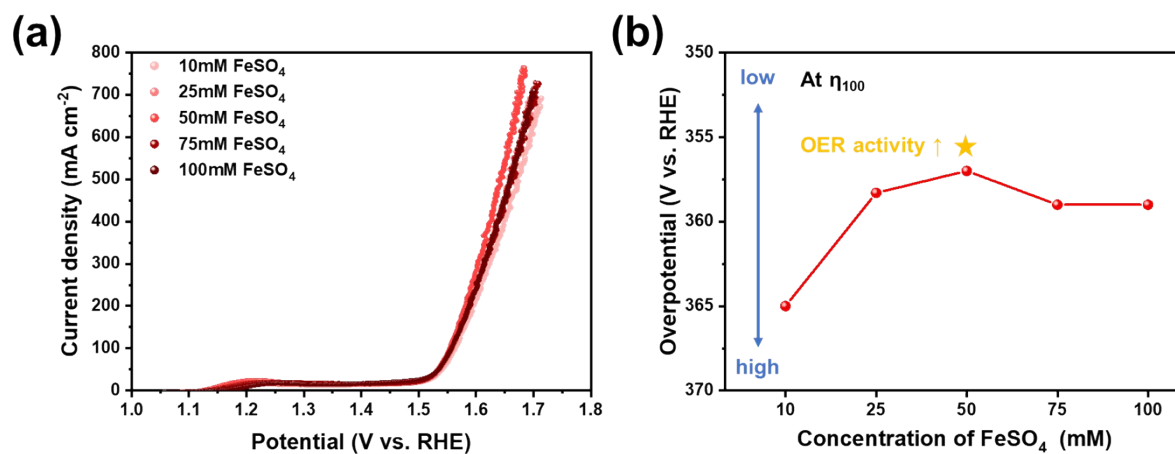

**Figure S16.** (a) LSV curves at  $2\text{mV s}^{-1}$  with 90% iR compensation, (b) volcano plot of  $\text{NH}_2\text{-CoFe}$  MOF with different concentrations of  $\text{FeSO}_4$  aqueous solution.

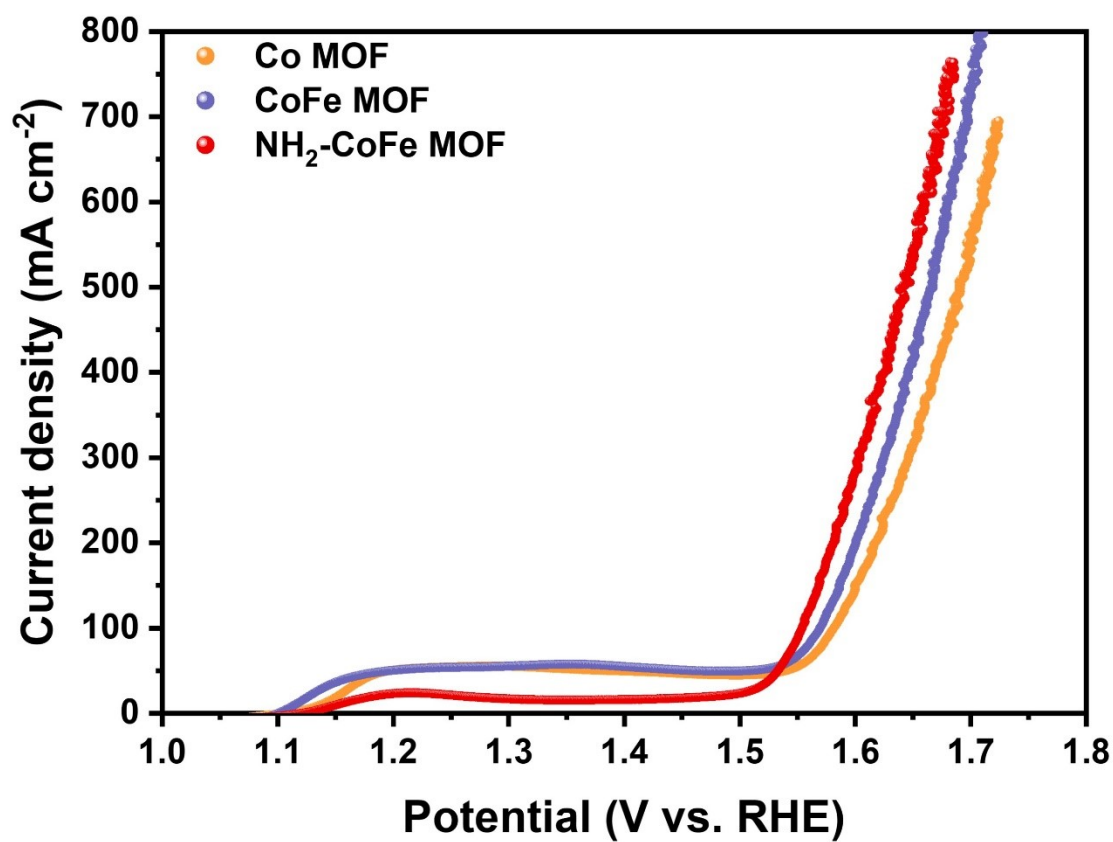

**Figure S17.** LSV curves of Co MOF, CoFe MOF, NH<sub>2</sub>-CoFe MOF with difference linkers at 2mV s<sup>-1</sup> with 90% iR compensation.

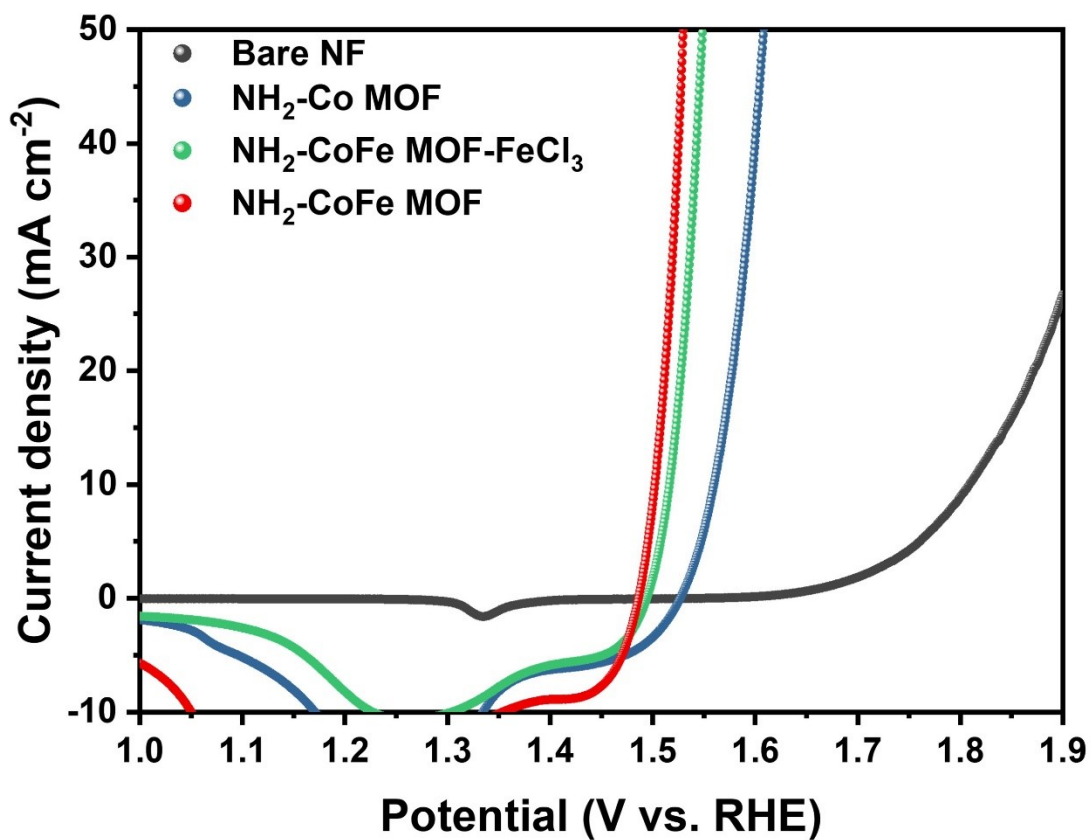

**Figure S18.** Backward LSV curves of Bare NF, NH<sub>2</sub>-Co MOF, NH<sub>2</sub>-CoFe MOF-FeCl<sub>3</sub>, and NH<sub>2</sub>-CoFe MOF at 2mV s<sup>-1</sup> with 90% iR compensation.

**Table S3.** Overpotential of OER catalysts at 100 mA cm<sup>-2</sup>.

| Sample                                      | Overpotential at 100 mA cm <sup>-2</sup> |
|---------------------------------------------|------------------------------------------|
| NF                                          | 729 mV                                   |
| Co MOF                                      | 351 mV                                   |
| NH <sub>2</sub> -Co MOF                     | 401 mV                                   |
| CoFe MOF                                    | 339 mV                                   |
| NH <sub>2</sub> -CoFe MOF-FeCl <sub>3</sub> | 346 mV                                   |
| NH <sub>2</sub> -CoFe MOF                   | 310 mV                                   |



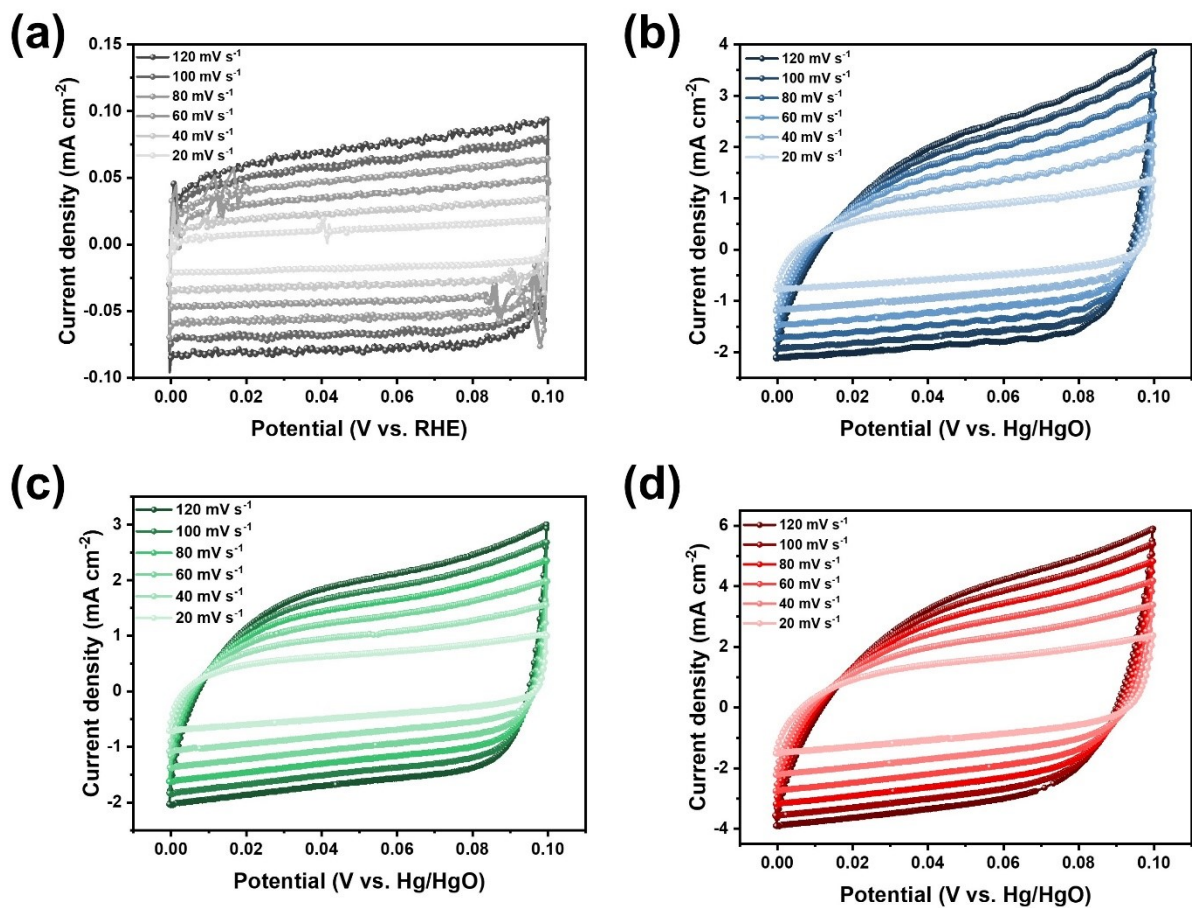

**Figure S19.** Cyclic voltammograms of (a) Bare NF, (b) NH<sub>2</sub>-Co MOF, (c) NH<sub>2</sub>-CoFe MOF-FeCl<sub>3</sub>, and (d) NH<sub>2</sub>-CoFe MOF.

**Table S4.** Calculated ECSA from  $C_{dl}$  values of NF, NH<sub>2</sub>-Co MOF, NH<sub>2</sub>-CoFe MOF-FeCl<sub>3</sub> and NH<sub>2</sub>-CoFe MOF.

|                         | NF    | NH <sub>2</sub> -Co MOF | NH <sub>2</sub> -CoFe MOF-FeCl <sub>3</sub> | NH <sub>2</sub> -CoFe MOF |
|-------------------------|-------|-------------------------|---------------------------------------------|---------------------------|
| ECSA (cm <sup>2</sup> ) | 31.25 | 688.0                   | 624.0                                       | 1113.5                    |

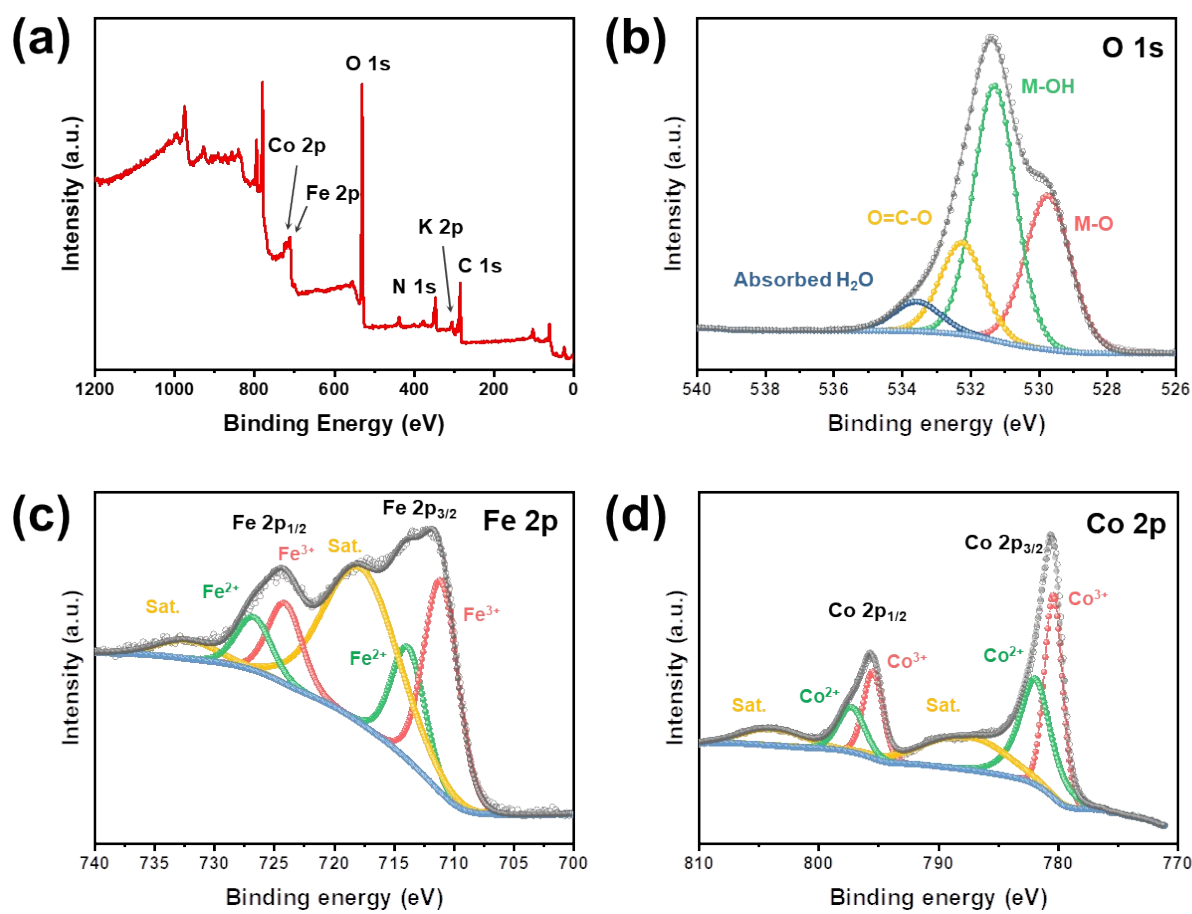

**Figure S20.** XPS spectra of NH<sub>2</sub>-CoFe MOF after stability test for 50 h, (a) survey; (b) O 1s; (c) Fe 2p; (d) Co 2p.

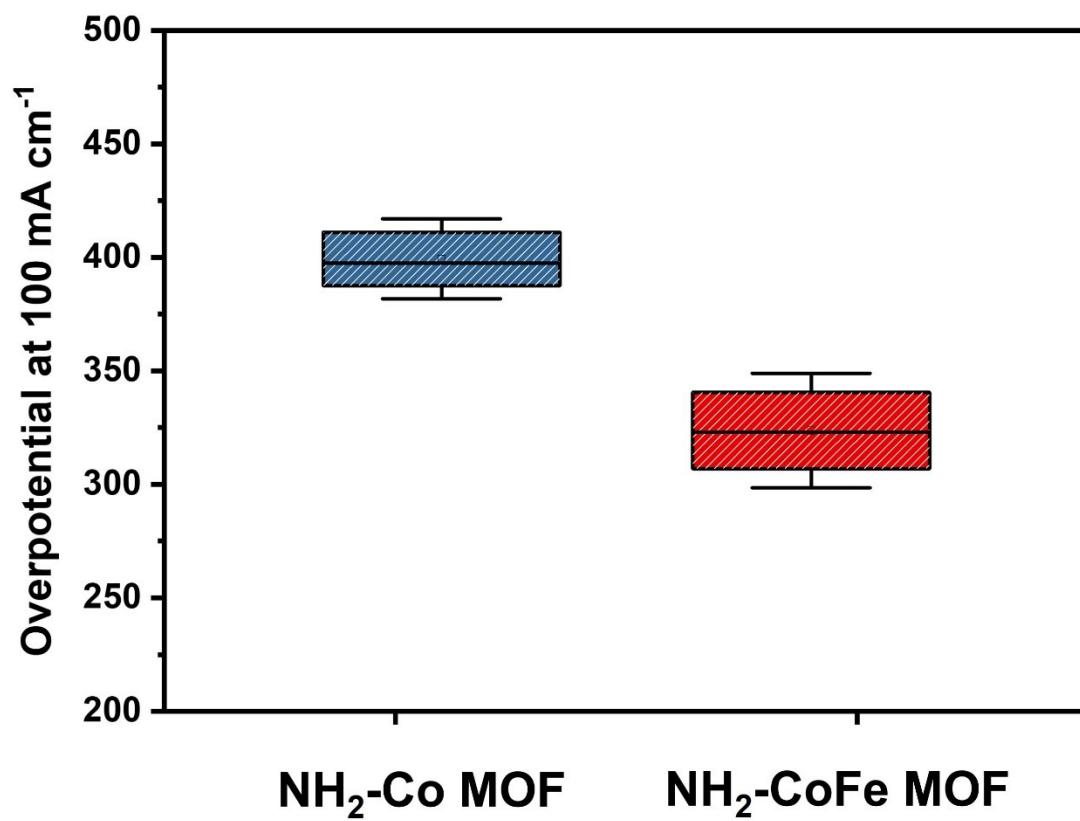

Figure S21. Reproducibility test of the NH<sub>2</sub>-Co MOF, NH<sub>2</sub>-CoFe MOF.

**Table S5.** Catalytic properties for OER of the Fe, and Co-based electrocatalysts in alkaline electrolyte.

| Electrocatalysts                                                                | Electrode | Current density                                               | Over potential                 | Tafel slope                     | Stability    | Ref.             |
|---------------------------------------------------------------------------------|-----------|---------------------------------------------------------------|--------------------------------|---------------------------------|--------------|------------------|
| <b>NH<sub>2</sub>-CoFe MOF</b>                                                  | <b>NF</b> | <b>10 mA cm<sup>-2</sup></b><br><b>100 mA cm<sup>-2</sup></b> | <b>271 mV</b><br><b>310 mV</b> | <b>59.3 mV dec<sup>-1</sup></b> | <b>100 h</b> | <b>This work</b> |
| Fe@Co-BDC NSs                                                                   | GC        | 10 mA cm <sup>-2</sup>                                        | 307 mV                         | 34.1 mV dec <sup>-1</sup>       | 20000 s      | [86]             |
| CoFe LDH/MOF/CC                                                                 | CC        | 10 mA cm <sup>-2</sup>                                        | 276 mV                         | 85 mV dec <sup>-1</sup>         | 60 h         | [87]             |
| Co <sub>4</sub> Fe <sub>2</sub> -LDHs/Co(OH) <sub>2</sub> -NW                   | NF        | 10 mA cm <sup>-2</sup>                                        | 276 mV                         | 50.67 mV dec <sup>-1</sup>      | 60 h         | [88]             |
| Co/Fe bimetal-organic frameworks                                                | GC        | 10 mA cm <sup>-2</sup>                                        | 280 mV                         | 44.7 mV dec <sup>-1</sup>       | 12000 s      | [89]             |
| Fe-MnO <sub>2</sub> /NF                                                         | NF        | 20 mA cm <sup>-2</sup>                                        | 330 mV                         | 51 mV dec <sup>-1</sup>         | 24 h         | [90]             |
| Co <sub>0.1</sub> (Hatz) <sub>0.1</sub> (H <sub>4</sub> bta) <sub>0.1</sub> /NF | NF        | 50 mA cm <sup>-2</sup><br>100 mA cm <sup>-2</sup>             | 294 mV<br>327 mV               | 93 mV dec <sup>-1</sup>         | 24 h         | [91]             |

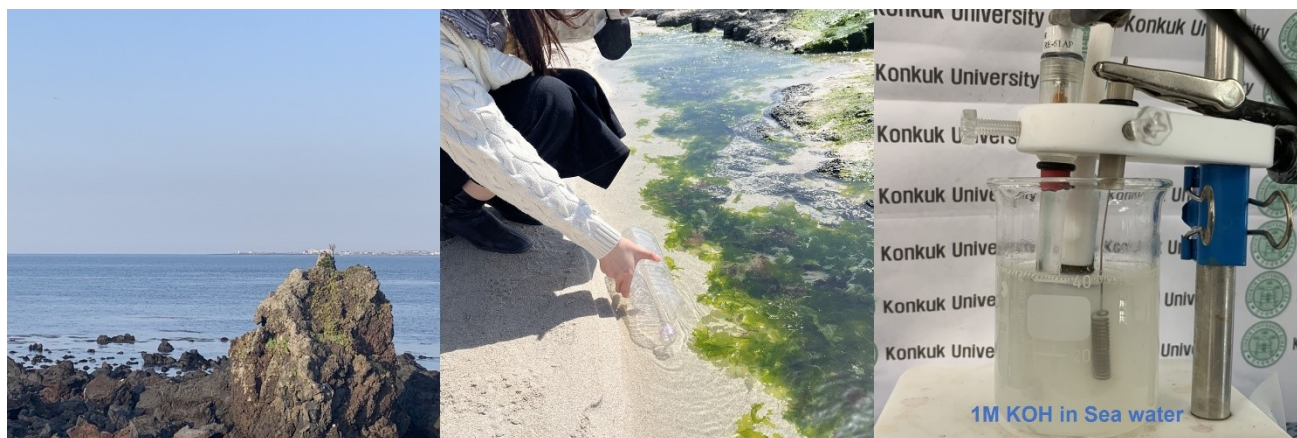

**Figure S22.** Photographs of natural seawater of Gimnyeong sea in Jeju island, Korea and 3 electrode cell for OER measurement in 1M KOH with sea water.
